# Supplementary material for: Novel Cyclophilin Inhibitor Decreases Cell Proliferation and Tumor Growth in Models of Hepatocellular Carcinoma
Source: MDPI journal article supplement (doi:10.3390/cancers13123041), 2021-06-18
Supplement: s1 [file s1]

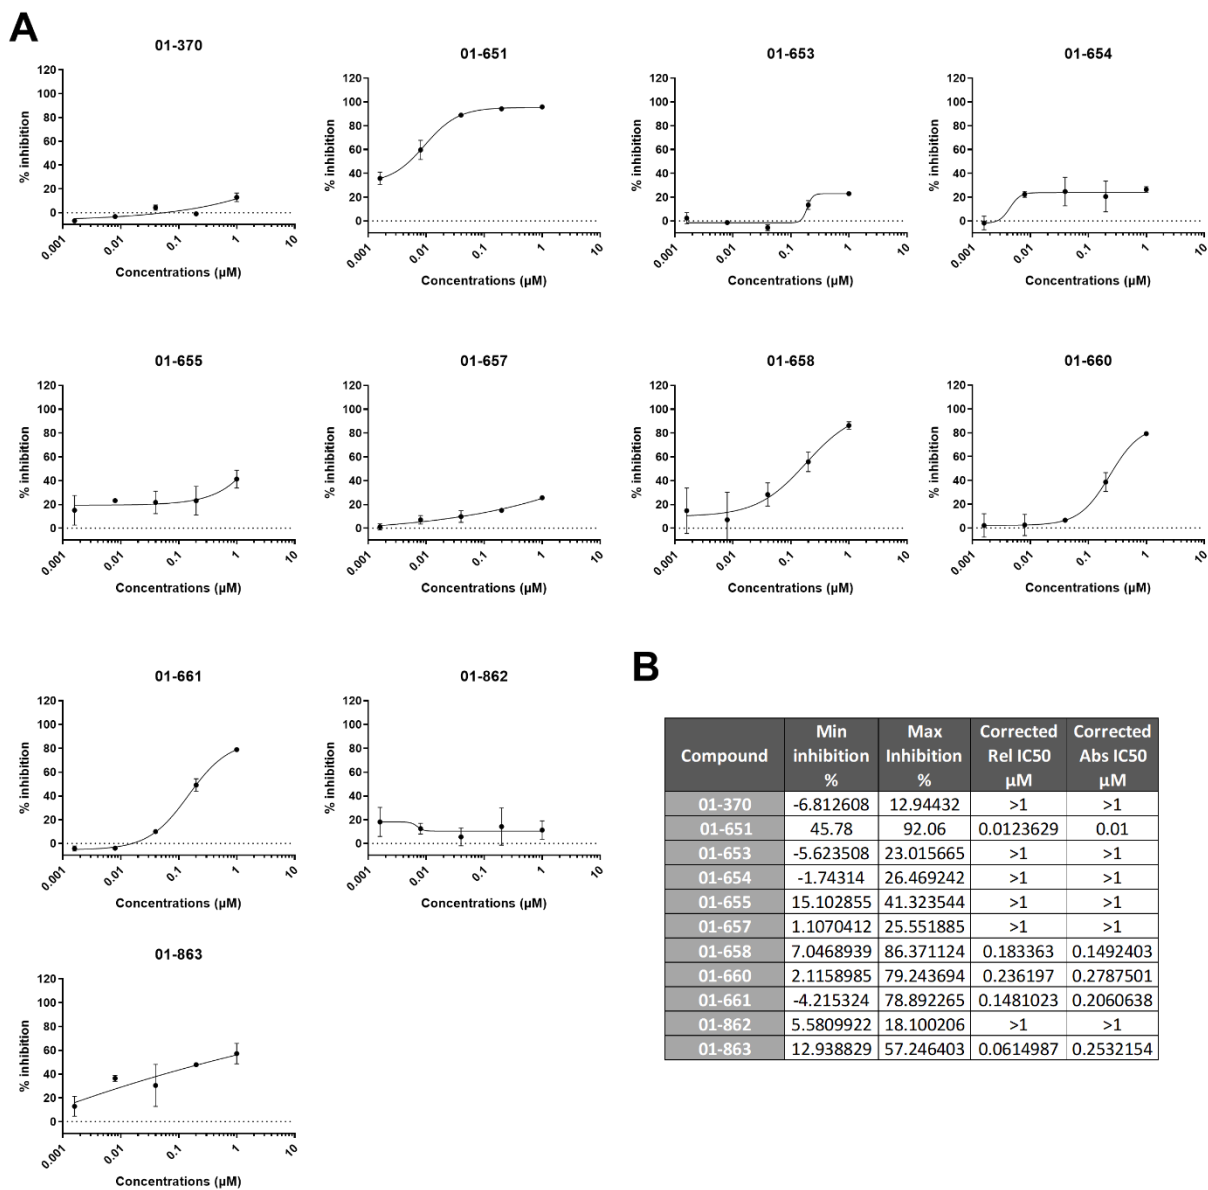

**Figure S1.** Compound screening for SfA-derived cyclophilin inhibitors **(A)** Antiproliferative activity was evaluated in duplicates in a set of SfA-derived inhibitors at different doses in HUH-7 cells. Data are presented as Mean  $\pm$  SD; **(B)** Table indicating the minimal and maximal inhibition and relative and absolute IC<sub>50</sub> values for the tested SfA-derived cyclophilin inhibitors
